# Supplementary material
Source: PubMed Central journal article supplement (PMC6608077)
Supplement: JLB-102-551-s001.pdf [file JLB-102-551-s001.pdf]

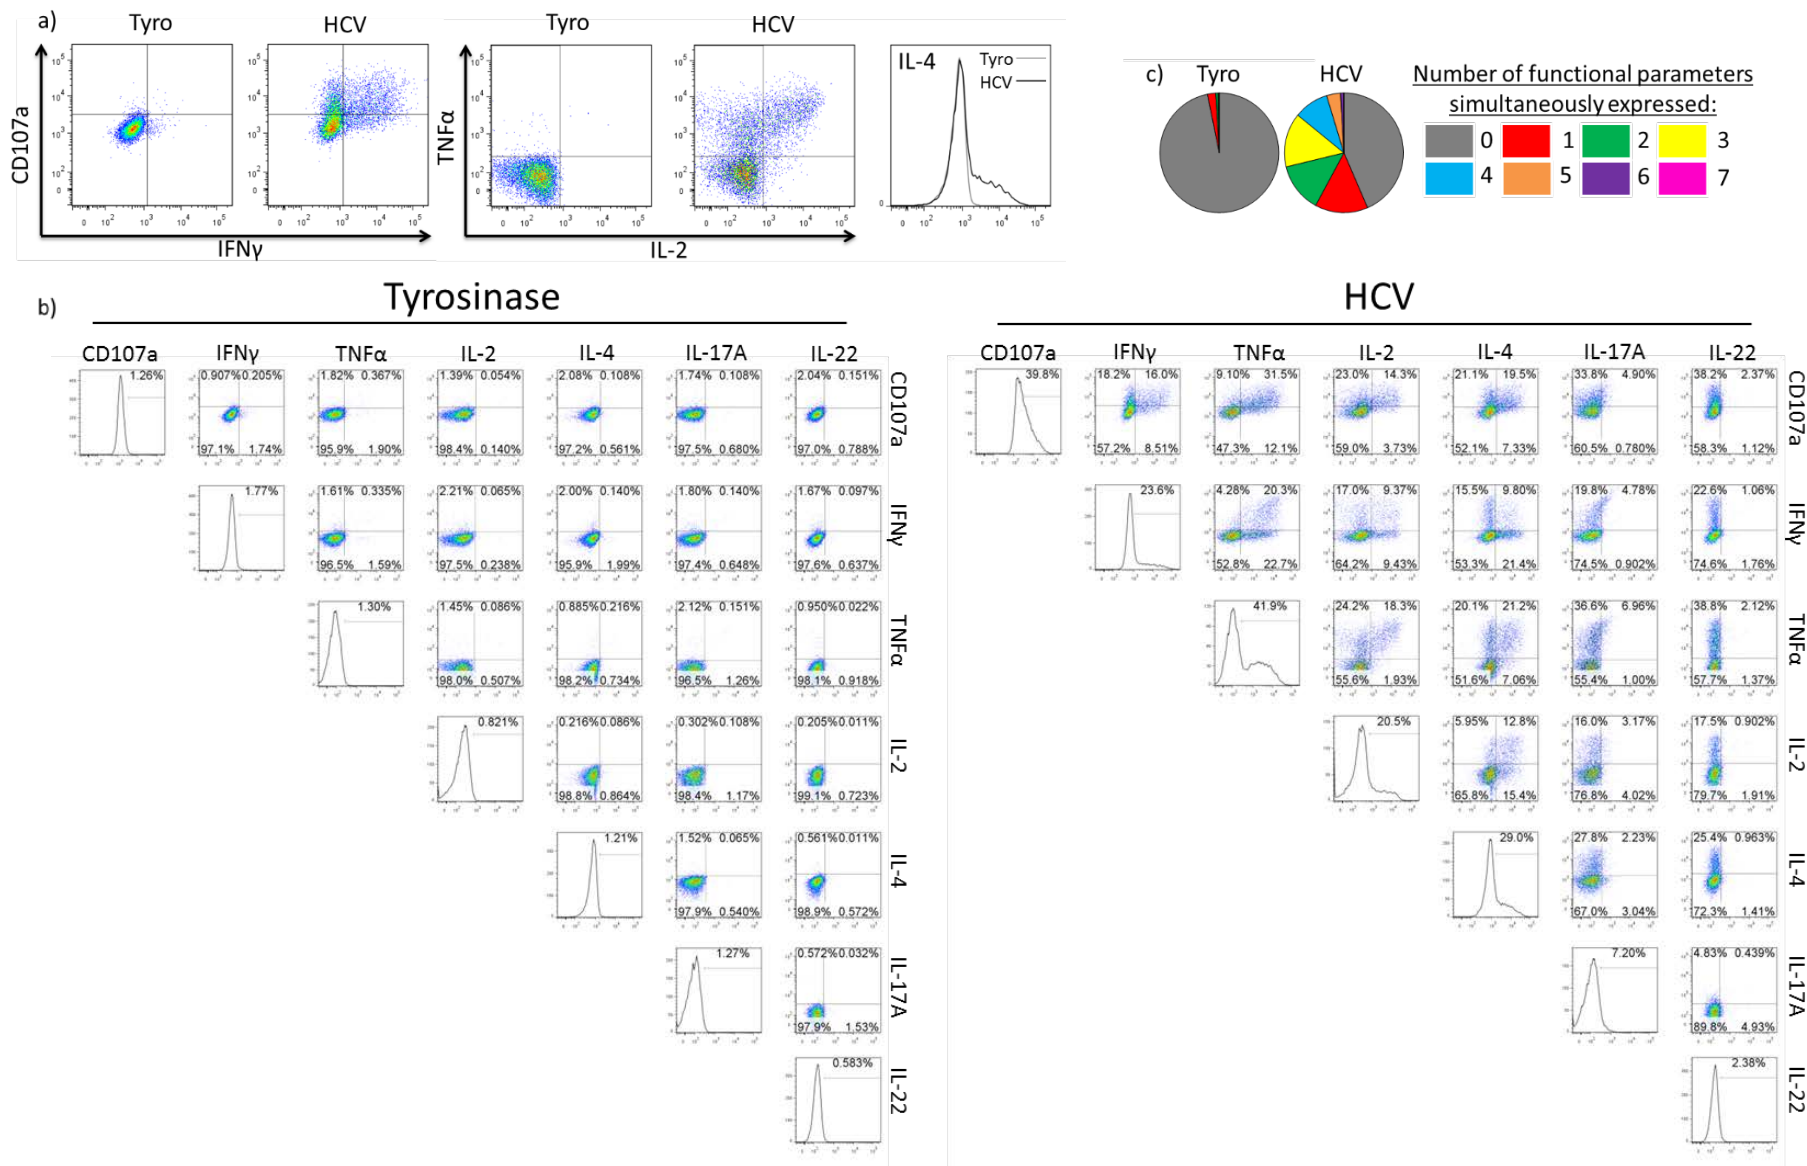

**Supplementary Figure S1. Limitations of multi-dimensional analysis in FlowJo.** (a) Examples of traditional histogram and dotplots comparisons for analysis of one or two functional parameters at a time; (b) matrix of single and pairwise comparisons for CD107a, IFN $\gamma$ , TNF $\alpha$ , IL-2, IL-4, IL-17A, and IL-22; (c) Boolean gating for 7 parameters generates 128 possible combinations of phenotype frequencies. Frequencies can be summed and represented as wedges in a pie chart as 0 (gray), 1 (red), 2 (green), 3 (yellow), 4 (blue), 5 (orange), 6 (purple), or 7 (pink) parameters positive. Reactivity for CD8<sup>+</sup> HCV TCR-transduced T cells stimulated with tyrosinase:368-376 or HCV NS3:1406-1415 peptides is shown.
